# Supplementary material for: 1,25-Dihydroxyvitamin D3 Provides Benefits in Vitiligo Based on Modulation of CD8+ T Cell Glycolysis and Function
Source: MDPI journal article supplement (doi:10.3390/nu15214697), 2023-11-06
Supplement: s1 [file s1]

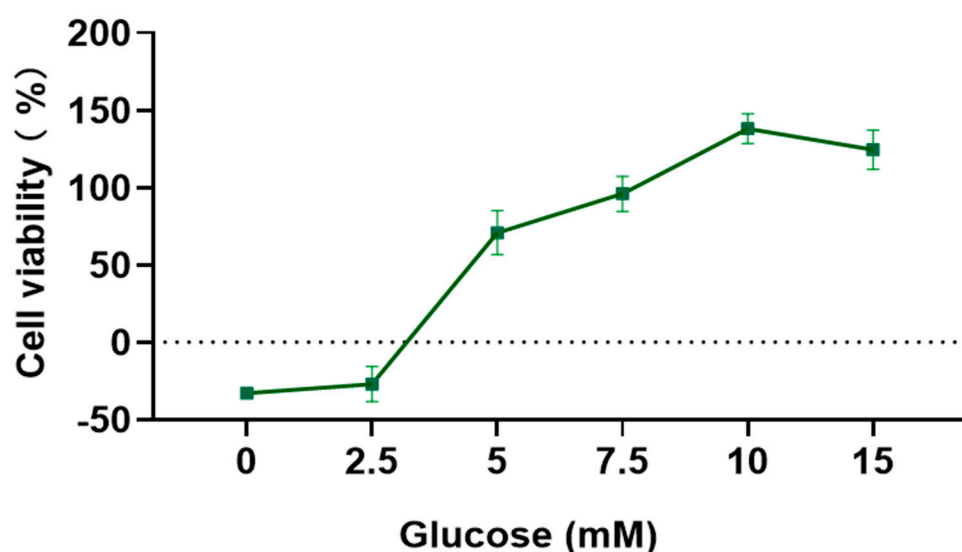

**Figure S1.** Cell viability of Tall-104 cells in different glucose concentrations cultured for 72 h, determined using CCK-8 analysis.

**Table S1.** Significantly different genes in peripheral blood mononuclear cell samples from participants receiving 1,25(OH)<sub>2</sub>D<sub>3</sub> and controls.

| Gene name | p Value     | Log <sub>2</sub> FC | Change |
|-----------|-------------|---------------------|--------|
| ZNF493    | 0.000514369 | −2.847003948        | down   |
| SPOP      | 0.000578038 | −2.691764563        | down   |
| MID1IP1   | 0.000702233 | −2.386975273        | down   |
| RPL11     | 0.000927457 | 17.33390635         | up     |
| TRAPPC1   | 0.000931115 | −2.112686645        | down   |
| MAP1LC3A  | 0.001107775 | −2.752128316        | down   |
| TUBA4A    | 0.001477045 | −5.312375851        | down   |
| RPS28     | 0.001580771 | −10.11611965        | down   |
| CD37      | 0.001656278 | −3.979420153        | down   |
| SNRNP70   | 0.001715045 | −3.180022248        | down   |
| NDE1      | 0.001813882 | −4.966306472        | down   |
| BICD2     | 0.001848346 | −2.28316845         | down   |
| CDAN1     | 0.002203658 | −10.47737987        | down   |
| EGLN2     | 0.002295192 | −4.870214396        | down   |
| DUSP22    | 0.002315663 | −2.131845984        | down   |
| IL18      | 0.002335676 | −9.259413617        | down   |
| CLINT1    | 0.00242058  | 2.433742447         | up     |
| RHOU      | 0.002445738 | 2.299298122         | up     |
| PAK2      | 0.002649921 | −2.120541808        | down   |
| MAP4K2    | 0.002917921 | −2.577165752        | down   |
| DPEP2     | 0.003014088 | −3.775971003        | down   |
| BTF3      | 0.003174102 | 6.647639338         | up     |
| ARHGEF3   | 0.003434715 | 3.874514041         | up     |

|         |             |              |      |
|---------|-------------|--------------|------|
| S1PR4   | 0.003460417 | -2.859850595 | down |
| ZNF486  | 0.003465097 | -14.51052417 | down |
| TOM1    | 0.003483513 | -3.007592253 | down |
| PFDN5   | 0.003588983 | 9.826718666  | up   |
| ASXL2   | 0.003920204 | -2.239287816 | down |
| CPPED1  | 0.004120869 | -2.51374911  | down |
| TMX4    | 0.004465498 | -2.038413717 | down |
| IFI44   | 0.004468412 | 5.199037022  | up   |
| MCM8    | 0.004558078 | -10.24514101 | down |
| PDE4C   | 0.004857214 | -6.808602199 | down |
| DMC1    | 0.004944945 | -14.02246088 | down |
| UBXN4   | 0.005429135 | 2.886995483  | up   |
| DOCK8   | 0.005580443 | 3.166057321  | up   |
| SON     | 0.005721416 | 2.961136813  | up   |
| PANX2   | 0.005891666 | -3.191828602 | down |
| FKTN    | 0.00610848  | -8.213856489 | down |
| FCGR3A  | 0.00626856  | -3.983069812 | down |
| GALK1   | 0.006432826 | -2.504318451 | down |
| SH2B3   | 0.00682418  | 2.147315407  | up   |
| EIF1    | 0.007036127 | 4.122852152  | up   |
| PPP4C   | 0.0071493   | -2.186519556 | down |
| LRCH4   | 0.00715465  | -2.531176505 | down |
| SLC44A4 | 0.007607274 | -8.540190884 | down |
| DCAF6   | 0.007652924 | 3.930443053  | up   |
| PRKY    | 0.007672196 | 2.021562744  | up   |
| EFR3A   | 0.007714641 | 3.0855519    | up   |
| UBE2D3  | 0.007842766 | 4.713846655  | up   |
| AIRE    | 0.008140488 | -10.62758784 | down |
| PCMTD1  | 0.008214796 | 3.472529254  | up   |
| DAPP1   | 0.008310967 | -10.36001228 | down |
| OCIAD1  | 0.008862567 | -11.74023951 | down |
| ZNF430  | 0.008885496 | -8.701117738 | down |
| HIGD1A  | 0.008987185 | 2.285060208  | up   |
| SAMD9   | 0.009048188 | 2.970010631  | up   |
| BIN1    | 0.009258608 | -2.883696545 | down |
| VAV3    | 0.009538507 | 3.001688333  | up   |
| RELL1   | 0.009892822 | -3.140407112 | down |
| HBB     | 0.009921654 | -4.485940109 | down |
| DNAJA4  | 0.01015338  | 2.18075703   | up   |
| SRP14   | 0.010396603 | 3.65903234   | up   |
| LEMD3   | 0.010616041 | 2.454027814  | up   |
| YIPF3   | 0.010780933 | -2.672600416 | down |
| GLRX    | 0.010789529 | 5.464505284  | up   |
| GIMAP4  | 0.011160228 | 5.790432998  | up   |
| THOC7   | 0.011304209 | 2.283658253  | up   |
| CX3CR1  | 0.011707332 | 6.053255623  | up   |
| DUXAP3  | 0.011793122 | -13.04794083 | down |
| CHMP5   | 0.011807181 | 4.116988545  | up   |
| NBPF8   | 0.011995922 | -4.66680721  | down |
| MIF     | 0.012166957 | -2.983745554 | down |

|            |             |              |      |
|------------|-------------|--------------|------|
| YBX1       | 0.012379299 | 7.281871457  | up   |
| VHL        | 0.012415268 | -2.195611652 | down |
| ANKRD12    | 0.012535208 | 2.236581891  | up   |
| PLIN5      | 0.012566215 | -5.267740959 | down |
| LOC729086  | 0.012688584 | -3.38767488  | down |
| ACP1       | 0.012900356 | 2.83881093   | up   |
| XPNPEP3    | 0.012978855 | -6.673035916 | down |
| MYADM      | 0.013002128 | -4.424225183 | down |
| ABTB1      | 0.013107445 | -4.268135944 | down |
| RPS24      | 0.013168479 | 14.30196138  | up   |
| PSMD12     | 0.013338951 | -7.270633059 | down |
| APOBEC3A   | 0.01355369  | -2.478931381 | down |
| RAB11A     | 0.013815134 | 2.327765458  | up   |
| COPE       | 0.013903205 | -2.157009747 | down |
| ZFAND5     | 0.014164853 | 5.456199045  | up   |
| PSMA4      | 0.014165935 | 4.306809597  | up   |
| RPL41      | 0.014386505 | 18.48492976  | up   |
| LPAR2      | 0.014640422 | -2.144470372 | down |
| CDKN2AIPNL | 0.01498333  | -12.69944057 | down |
| ARPC4      | 0.015174996 | -3.181261471 | down |
| ABHD5      | 0.015227893 | -2.557281368 | down |
| PDCD10     | 0.015325921 | 3.115975322  | up   |
| HBG2       | 0.016003495 | 33.40663814  | up   |
| TST        | 0.016005571 | -2.928785268 | down |
| PRNP       | 0.016072929 | 3.533774012  | up   |
| TPI1       | 0.016445236 | -2.366161816 | down |
| LOC399900  | 0.016540279 | -10.44139089 | down |
| RNASEK     | 0.016633924 | -3.834313291 | down |
| OAS2       | 0.016643418 | 4.502838479  | up   |
| PNRC2      | 0.016661589 | 3.271739771  | up   |
| SESN3      | 0.016722497 | 4.329816016  | up   |
| DCP2       | 0.016952567 | 3.099322111  | up   |
| TRIM22     | 0.016955847 | 2.991014026  | up   |
| PPP1R15A   | 0.016970743 | -2.540486383 | down |
| CHPT1      | 0.017186307 | 4.840124293  | up   |
| STAT1      | 0.017448966 | 4.585159964  | up   |
| HBG1       | 0.017493897 | 31.28977235  | up   |
| CALM3      | 0.017520142 | -3.636926926 | down |
| MKNK2      | 0.017622919 | -4.161188249 | down |
| LY96       | 0.017703541 | 5.091224758  | up   |
| IL10       | 0.017865749 | -12.10476322 | down |
| VPS37C     | 0.018513898 | -2.562283922 | down |
| SNRK       | 0.018689567 | 2.253683142  | up   |
| TAGLN2     | 0.018934981 | -2.585136782 | down |
| RAB10      | 0.019317952 | 3.78876991   | up   |
| AMFR       | 0.019362202 | 2.061769961  | up   |
| RPLP1      | 0.019512209 | -9.718744679 | down |
| COX7B      | 0.019698225 | 2.481819442  | up   |
| S100A8     | 0.019951433 | 18.52070587  | up   |
| CNIH4      | 0.019994456 | 3.100313833  | up   |

|          |             |              |      |
|----------|-------------|--------------|------|
| AURKAIP1 | 0.020053843 | −2.233657563 | down |
| CD52     | 0.020099214 | 7.461381203  | up   |
| FCGR3B   | 0.020251361 | −7.932913922 | down |
| CYP4F3   | 0.021176117 | −2.379307531 | down |
| CREG1    | 0.021837992 | 2.862620488  | up   |
| ZBTB33   | 0.022384181 | 2.004336355  | up   |
| NDUFB3   | 0.022643895 | 3.270027827  | up   |
| DDX17    | 0.022804584 | −2.085443911 | down |
| ITGB1    | 0.023204974 | 5.021816174  | up   |
| ZNF302   | 0.023401206 | 2.192614297  | up   |
| BNIP2    | 0.023727147 | 2.169807766  | up   |
| RPS4Y1   | 0.023839606 | 17.26368493  | up   |
| MAGT1    | 0.024152026 | −8.924097264 | down |
| OXR1     | 0.025334506 | 2.312969406  | up   |
| RPS27L   | 0.025418053 | 3.047805588  | up   |
| SUMO2    | 0.025770289 | −3.018622699 | down |
| C2orf69  | 0.025993417 | −10.77752958 | down |
| TIMP1    | 0.026031594 | −6.505965799 | down |
| VASP     | 0.026038931 | −2.931645215 | down |
| RPL37A   | 0.026340798 | −6.544284489 | down |
| RPL17    | 0.026528518 | 13.27305914  | up   |
| FECH     | 0.026989462 | 4.404752758  | up   |
| CFLAR    | 0.027371381 | −5.986486437 | down |
| PTPRE    | 0.027504709 | 2.10973939   | up   |
| DOCK10   | 0.027555289 | 2.188021125  | up   |
| REEP5    | 0.027671756 | 3.258784662  | up   |
| SACM1L   | 0.028097594 | 2.07955278   | up   |
| CXXC5    | 0.028272743 | −2.760487161 | down |
| KAT2B    | 0.028411106 | 3.801927373  | up   |
| TUBA1A   | 0.028603775 | −3.246343481 | down |
| AKR1D1   | 0.028900515 | −7.52828431  | down |
| COX6C    | 0.028917164 | 3.959619882  | up   |
| GPSM3    | 0.029039404 | −3.900090195 | down |
| ZYG11B   | 0.029315388 | −2.269124011 | down |
| PLAC8    | 0.029942775 | 2.891651469  | up   |
| NIN      | 0.029976815 | 2.298480814  | up   |
| COX7C    | 0.030237873 | 5.808368838  | up   |
| RPL21    | 0.030496145 | 8.92081392   | up   |
| HSP90AA1 | 0.030628941 | 3.476156222  | up   |
| DEFA1    | 0.030673762 | 24.34192911  | up   |
| TMX1     | 0.031035185 | 2.994825371  | up   |
| TPT1     | 0.031310834 | 13.10266041  | up   |
| LTB      | 0.0319833   | −5.306168425 | down |
| RPL7L1   | 0.032526104 | −8.648114665 | down |
| SRP9     | 0.033147126 | 5.28173456   | up   |
| CREB5    | 0.033174401 | −2.413769296 | down |
| RNASE6   | 0.03339557  | −2.340344619 | down |
| ERGIC1   | 0.034257494 | −2.01142471  | down |
| PTMA     | 0.034272029 | −4.331868726 | down |
| DTWD2    | 0.034830397 | −10.2274216  | down |

|              |             |              |      |
|--------------|-------------|--------------|------|
| RPS17        | 0.035226206 | 13.64381847  | up   |
| SNX3         | 0.035328306 | 4.912366927  | up   |
| TUBA1C       | 0.035471962 | -2.129728252 | down |
| FOXN2        | 0.035573563 | 2.515327543  | up   |
| RPL31        | 0.035833984 | 11.50873551  | up   |
| RPL35A       | 0.035941589 | 8.316620848  | up   |
| ATP6V0E1     | 0.035955778 | -3.201300061 | down |
| PJA2         | 0.03670776  | 4.739779747  | up   |
| RSL24D1      | 0.037044387 | 4.938108358  | up   |
| AKT1         | 0.037503369 | -2.247791605 | down |
| SIPA1        | 0.037877436 | -2.156557009 | down |
| AHR          | 0.037964929 | -11.15076124 | down |
| FKBP14       | 0.038143705 | -10.32910884 | down |
| CCM2         | 0.038446456 | -2.312660243 | down |
| CPVL         | 0.038717794 | 3.842546173  | up   |
| SMCR5        | 0.038792817 | -2.758201852 | down |
| TNS1         | 0.038944471 | 3.062504835  | up   |
| PSMC6        | 0.039068213 | 2.341921491  | up   |
| UBC          | 0.039918996 | -4.695739979 | down |
| CGGBP1       | 0.040071979 | 2.708629643  | up   |
| IL17RD       | 0.040092731 | -10.49800987 | down |
| ATP6V0B      | 0.040528364 | -3.119937176 | down |
| ZNF669       | 0.040534514 | -3.175903981 | down |
| TMEM181      | 0.040744268 | 2.197310897  | up   |
| CLEC4A       | 0.040960614 | 2.185286265  | up   |
| PDCD4        | 0.041029048 | -7.198580811 | down |
| NDUFS8       | 0.041202754 | -2.072312508 | down |
| YRDC         | 0.041437084 | -9.857209852 | down |
| CSF2RA       | 0.041671856 | -7.882229621 | down |
| RSAD2        | 0.042138575 | 3.651948084  | up   |
| TSC22D3      | 0.042174533 | -4.707836886 | down |
| XPB1         | 0.042442808 | 2.917357778  | up   |
| MFSD11       | 0.042746098 | -3.613888319 | down |
| ZNF738       | 0.042874804 | -10.70047248 | down |
| TRABD        | 0.042946168 | -2.275995511 | down |
| LOC100133177 | 0.043174457 | -5.714268039 | down |
| SNRPG        | 0.043369287 | 3.75063538   | up   |
| DOCK11       | 0.043906928 | 2.472411906  | up   |
| SPTLC1       | 0.043940578 | -9.843500377 | down |
| RPL6         | 0.043994871 | 9.609928794  | up   |
| SP110        | 0.044237893 | -2.540211282 | down |
| BLZF1        | 0.044306785 | -11.68481785 | down |
| PNPT1        | 0.044323959 | -11.34073405 | down |
| TMEM123      | 0.044796971 | 4.541145669  | up   |
| MBNL1        | 0.044863903 | 3.795921965  | up   |
| JMJD1C       | 0.04489485  | 2.478178889  | up   |
| TNFRSF14     | 0.044931191 | -2.122607388 | down |
| TXN          | 0.045072016 | 3.646943035  | up   |
| RPL30        | 0.045187766 | 9.245638309  | up   |
| TAX1BP1      | 0.045214698 | 3.061151707  | up   |

|         |             |              |      |
|---------|-------------|--------------|------|
| F11R    | 0.045297632 | −2.322989037 | down |
| RWDD1   | 0.045422849 | 2.830711154  | up   |
| XIST    | 0.04555491  | −3.404287145 | down |
| SRRD    | 0.045619599 | 2.042074231  | up   |
| TOMM7   | 0.046213016 | 7.291135907  | up   |
| LSM1    | 0.046381017 | 2.521023601  | up   |
| RPL36AL | 0.046808592 | 3.941950674  | up   |
| FAM104A | 0.046972549 | 5.980691838  | up   |
| IFIT2   | 0.047031902 | 7.616260826  | up   |
| MS4A7   | 0.04730251  | 2.439489777  | up   |
| RYBP    | 0.047741859 | −2.220611485 | down |
| ZNF14   | 0.047910039 | −11.99031792 | down |
| FCGRT   | 0.048016549 | −3.23669666  | down |
| TMEM17  | 0.048035512 | −8.742970026 | down |
| USP10   | 0.048252388 | −2.859232616 | down |
| LIPA    | 0.048359305 | 2.876972112  | up   |
| ACRBP   | 0.04845519  | −2.062230895 | down |
| SLC38A2 | 0.048503624 | 2.210704313  | up   |
| BIRC2   | 0.048856428 | 2.710496109  | up   |
| VPS41   | 0.048999342 | −5.68558612  | down |
| DNAJA1  | 0.049852133 | 2.914161501  | up   |

Total 244 aberrant expressed genes were identified, including 117 up- and 127 down-regulated genes.  $p < 0.05$ , FDR  $< 0.05$  and  $|\text{Log2FC}| > 2$ .
